# Supplementary material for: Tuning of the redox potential and catalytic activity of a new Cu(ii) complex byo-iminobenzosemiquinone as an electron-reservoir ligand
Source: Royal Society of Chemistry journal article supplement (doi:10.1039/c9nj06396j), 2020-01-01
Supplement: c9nj06396j1.pdf [file c9nj06396j1.pdf]

## Supporting Information

### Tuning of the redox potential and catalytic activity of a new Cu(II) complex by *o*-iminobenzosemiquinone as an Electron-reservoir ligand

Mina Nasibipour,<sup>[a]</sup> Elham Safaei,<sup>\*[a]</sup> Grzegorz Wrzeszcz,<sup>[b]</sup> Andrzej Wojtczak<sup>[b]</sup>

\*Corresponding address: *Department of Chemistry, College of Sciences, Shiraz University, 71454, Shiraz, Iran.*

Email: [e.safaei@shirazu.ac.ir](mailto:e.safaei@shirazu.ac.ir)

Phone No. 00989173078406

| contents                                                                                                                                                                | page |
|-------------------------------------------------------------------------------------------------------------------------------------------------------------------------|------|
| IR spectrum of H <sub>2</sub> L <sup>NAP</sup>                                                                                                                          | S2   |
| IR spectrum of CuL <sup>NIS</sup>                                                                                                                                       | S2   |
| NMR spectrum of H <sub>2</sub> L <sup>NAP</sup>                                                                                                                         | S3   |
| NMR spectrum of CuL <sup>NIS</sup>                                                                                                                                      | S3   |
| Crystallographic data and structure refinement                                                                                                                          | S4   |
| Bond distances (Å) and bond angles (°)                                                                                                                                  | S5   |
| Electronic spectrum of 2 mM CH <sub>2</sub> Cl <sub>2</sub> solutions of L <sub>2</sub> <sup>NIS</sup> Cu <sup>II</sup> after homocoupling of phenyl acetylene reaction | S6   |
| <sup>1</sup> H NMR spectrum of 1,4-diphenyl buta-1,3-diyne                                                                                                              | S7   |
| <sup>1</sup> H NMR spectrum of 1,4-di(pyridin-2-yl)buta-1,3-diyne                                                                                                       | S8   |
| <sup>1</sup> H NMR spectrum of 1,4- <i>bis</i> ( <i>p</i> -fluorophenyl)buta-1,3-diyne                                                                                  | S9   |
| <sup>1</sup> H NMR spectrum of 1,4- <i>bis</i> ( <i>p</i> -tolyl)buta-1,3-diyne                                                                                         | S10  |
| <sup>1</sup> H NMR spectrum of 1, 4- <i>bis</i> (4-methoxyphenyl)buta-1,3-diyne                                                                                         | S11  |
| <sup>1</sup> H NMR spectrum of 1,4- <i>bis</i> (2-chlorophenyl)buta-1,3-diyne                                                                                           | S12  |

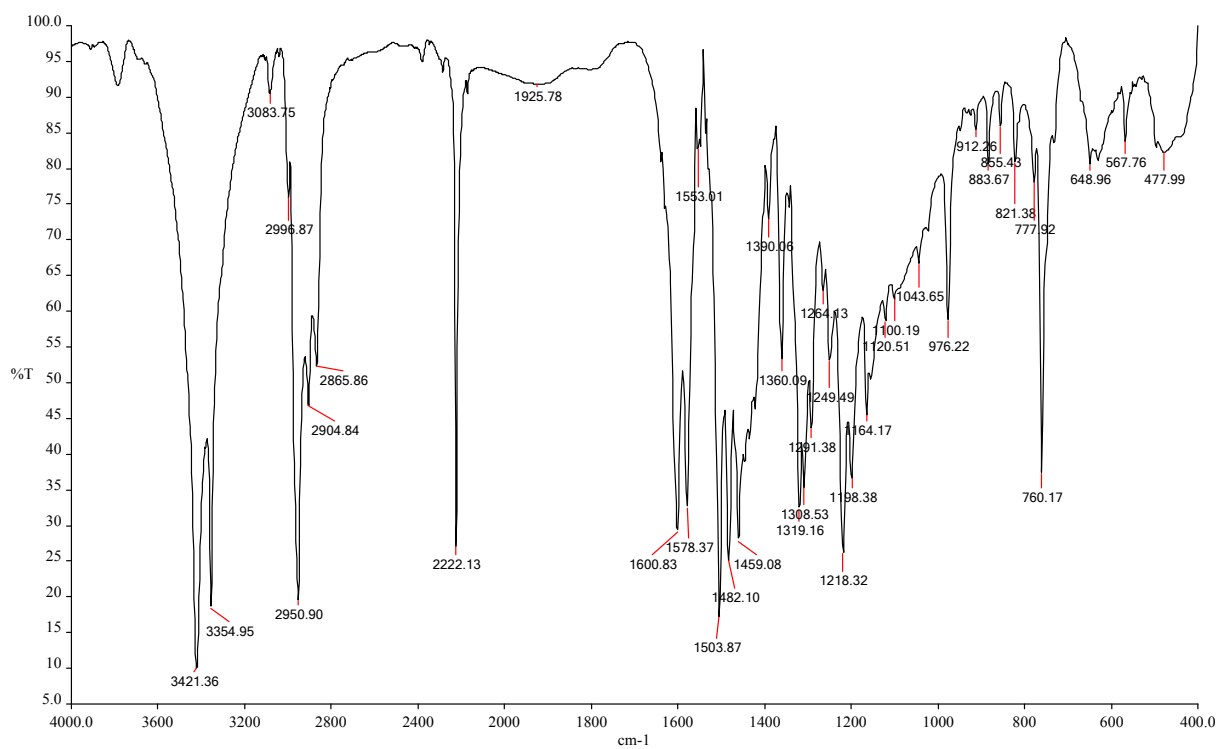

Figure S1 IR spectrum of H<sub>2</sub>L<sup>NAP</sup>.

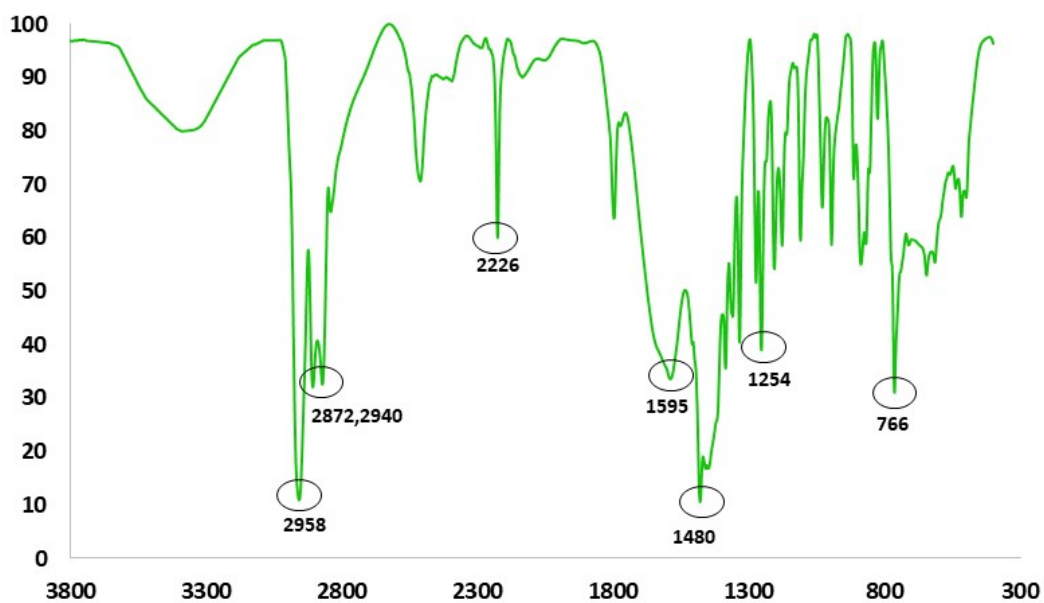

Figure S2 IR spectrum of CuL<sup>NIS</sup>.

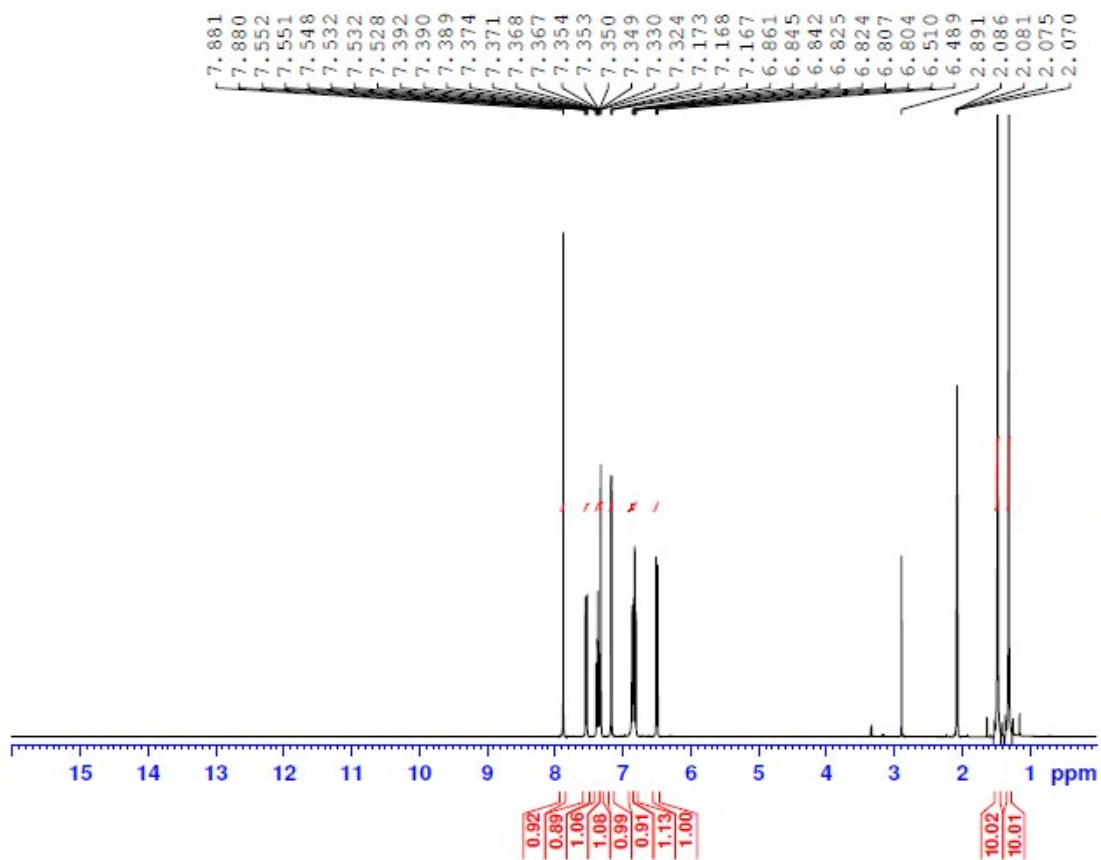

Figure S3  $^1\text{H}$  NMR spectrum of  $\text{H}_2\text{L}^{\text{NAP}}$ .

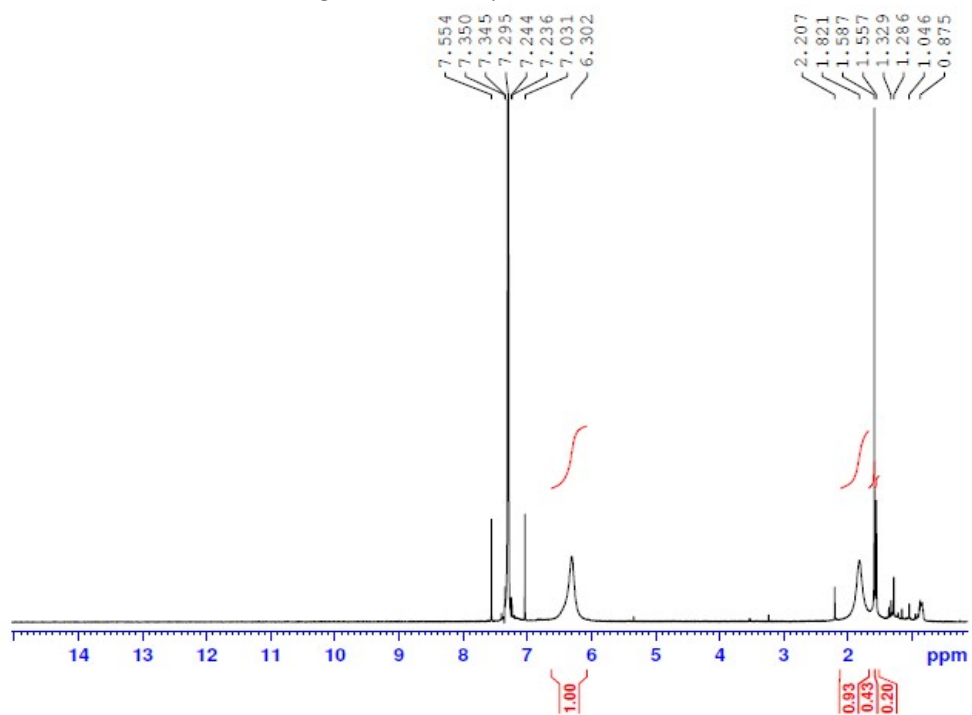

Figure S4  $^1\text{H}$  NMR spectrum of  $\text{CuL}^{\text{NIS}}$ .

Table S1. Crystallographic data for CuL<sup>NIS</sup>

|                                   |                                             |
|-----------------------------------|---------------------------------------------|
| Identification code               | e1317a                                      |
| Empirical formula                 | C42 H48 Cu N4 O2                            |
| Formula weight                    | 704.38                                      |
| Temperature                       | 293(2) K                                    |
| Wavelength                        | 0.71073 Å                                   |
| Crystal system                    | Triclinic                                   |
| Space group                       | P-1                                         |
| Unit cell dimensions              | a = 8.5030(5) Å                             |
|                                   | b = 10.8824(8) Å                            |
|                                   | c = 11.7661(10) Å                           |
|                                   | $\alpha = 114.768(8)^\circ$ .               |
|                                   | $\beta = 90.404(6)^\circ$ .                 |
|                                   | $\gamma = 92.966(5)^\circ$ .                |
| Volume                            | 986.78(14) Å <sup>3</sup>                   |
| Z                                 | 1                                           |
| Density (calculated)              | 1.185 Mg/m <sup>3</sup>                     |
| Absorption coefficient            | 0.591 mm <sup>-1</sup>                      |
| F(000)                            | 373                                         |
| Crystal size                      | 0.518 x 0.298 x 0.130 mm <sup>3</sup>       |
| Theta range for data collection   | 2.143 to 28.412°.                           |
| Index ranges                      | -7<=h<=11, -13<=k<=13, -10<=l<=15           |
| Reflections collected             | 6811                                        |
| Independent reflections           | 4344 [R(int) = 0.0512]                      |
| Completeness to theta = 25.000°   | 99.5 %                                      |
| Absorption correction             | Analytical                                  |
| Max. and min. transmission        | 0.944680 and 0.838343                       |
| Refinement method                 | Full-matrix least-squares on F <sup>2</sup> |
| Data / restraints / parameters    | 4344 / 0 / 257                              |
| Goodness-of-fit on F <sup>2</sup> | 1.003                                       |
| Final R indices [I>2sigma(I)]     | R1 = 0.0554, wR2 = 0.1439                   |
| R indices (all data)              | R1 = 0.0799, wR2 = 0.1741                   |
| Extinction coefficient            | n/a                                         |
| Largest diff. peak and hole       | 0.612 and -0.519 e.Å <sup>-3</sup>          |

| Table S2. Selected bond lengths [Å] and angles [°] for CuL <sup>NIS</sup> |            |               |            |
|---------------------------------------------------------------------------|------------|---------------|------------|
| Bonds                                                                     |            | Angles        |            |
| Cu1-O1                                                                    | 1.9210(19) | O1-Cu1-O1#1   | 180.0      |
| Cu1-O1#1                                                                  | 1.9210(19) | O1-Cu1-N1#1   | 96.82(8)   |
| Cu1-N1#1                                                                  | 1.928(2)   | O1#1-Cu1-N1#1 | 83.18(8)   |
| Cu1-N1                                                                    | 1.928(2)   | O1-Cu1-N1     | 83.18(8)   |
| O1-C1                                                                     | 1.298(3)   | O1#1-Cu1-N1   | 96.82(8)   |
| C1-C2                                                                     | 1.424(4)   | N1#1-Cu1-N1   | 180.0      |
| C1-C6                                                                     | 1.448(4)   | C1-O1-Cu1     | 113.53(17) |
| C2-C3                                                                     | 1.371(4)   | O1-C1-C2      | 123.9(2)   |
| C2-C14                                                                    | 1.529(4)   | O1-C1-C6      | 116.6(2)   |
| C3-C4                                                                     | 1.428(4)   | C2-C1-C6      | 119.5(2)   |
| C4-C5                                                                     | 1.361(4)   | C3-C2-C1      | 116.7(2)   |
| C4-C18                                                                    | 1.539(4)   | C3-C2-C14     | 122.5(2)   |
| C5-C6                                                                     | 1.416(4)   | C1-C2-C14     | 120.8(2)   |
| C6-N1                                                                     | 1.340(3)   | C2-C3-C4      | 124.7(3)   |
| N1-C7                                                                     | 1.412(3)   | C5-C4-C3      | 118.9(2)   |
| C7-C8                                                                     | 1.380(4)   | C5-C4-C18     | 122.0(3)   |
| C7-C12                                                                    | 1.395(4)   | C3-C4-C18     | 119.1(2)   |
| C8-C9                                                                     | 1.381(5)   | C4-C5-C6      | 119.7(3)   |
| C9-C10                                                                    | 1.373(6)   | N1-C6-C5      | 126.4(2)   |
| C10-C11                                                                   | 1.374(5)   | N1-C6-C1      | 113.1(2)   |
| C11-C12                                                                   | 1.383(4)   | C5-C6-C1      | 120.4(2)   |
| C12-C13                                                                   | 1.446(5)   | C6-N1-C7      | 120.4(2)   |
| C13-N2                                                                    | 1.133(5)   | C6-N1-Cu1     | 113.56(18) |
| C14-C17                                                                   | 1.530(5)   | C7-N1-Cu1     | 125.82(17) |
| C14-C15                                                                   | 1.534(4)   | C8-C7-C12     | 118.6(3)   |
| C14-C16                                                                   | 1.538(4)   | C8-C7-N1      | 121.5(3)   |
| C18-C21                                                                   | 1.485(7)   | C12-C7-N1     | 119.8(3)   |
| C18-C20                                                                   | 1.511(8)   | C7-C8-C9      | 121.1(3)   |
| C18-C20B                                                                  | 1.512(11)  | C10-C9-C8     | 120.0(3)   |
| C18-C21B                                                                  | 1.528(11)  | C9-C10-C11    | 119.6(3)   |
| C18-C19                                                                   | 1.532(8)   | C10-C11-C12   | 120.9(3)   |
| C18-C19B                                                                  | 1.536(11)  | C11-C12-C7    | 119.8(3)   |
|                                                                           |            | C11-C12-C13   | 121.2(3)   |
|                                                                           |            | C7-C12-C13    | 119.0(3)   |
|                                                                           |            | N2-C13-C12    | 178.4(4)   |
|                                                                           |            | C2-C14-C17    | 109.7(2)   |
|                                                                           |            | C2-C14-C15    | 111.3(3)   |
|                                                                           |            | C17-C14-C15   | 109.2(3)   |
|                                                                           |            | C2-C14-C16    | 109.6(3)   |
|                                                                           |            | C17-C14-C16   | 109.2(3)   |
|                                                                           |            | C15-C14-C16   | 107.8(3)   |
|                                                                           |            | C21-C18-C20   | 111.4(6)   |
|                                                                           |            | C20B-C18-C21B | 108.0(9)   |
|                                                                           |            | C21-C18-C19   | 106.6(6)   |
|                                                                           |            | C20-C18-C19   | 108.8(6)   |
|                                                                           |            | C20B-C18-C19B | 111.1(9)   |
|                                                                           |            | C21B-C18-C19B | 107.2(7)   |
|                                                                           |            | C21-C18-C4    | 109.9(4)   |
|                                                                           |            | C20-C18-C4    | 108.6(4)   |
|                                                                           |            | C20B-C18-C4   | 113.4(5)   |
|                                                                           |            | C21B-C18-C4   | 107.7(5)   |
|                                                                           |            | C19-C18-C4    | 111.5(3)   |
|                                                                           |            | C19B-C18-C4   | 109.2(4)   |

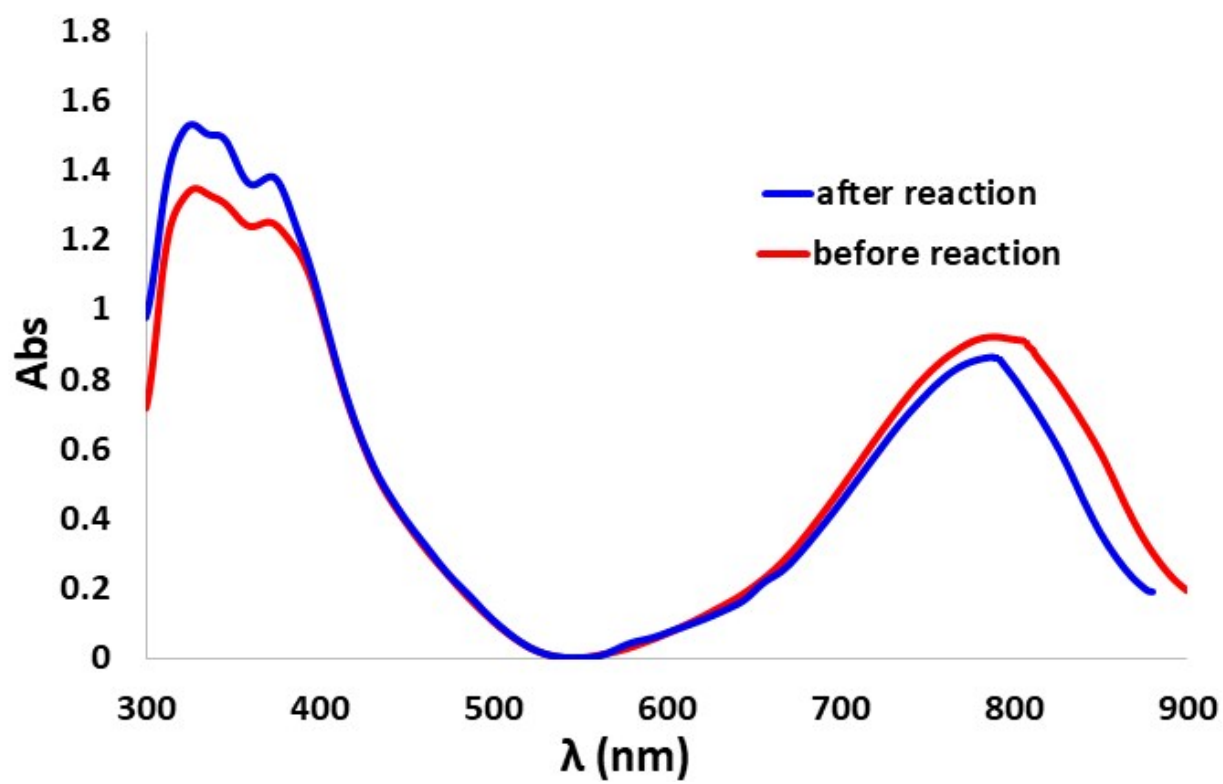

**Figure S5** Electronic spectrum of  $L_2^{NiSCu^{II}}$  solution in THF before coupling reaction (without KOH and phenyl acetylene addition) (—) after reaction (with KOH and phenyl acetylene addition) (—).

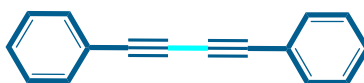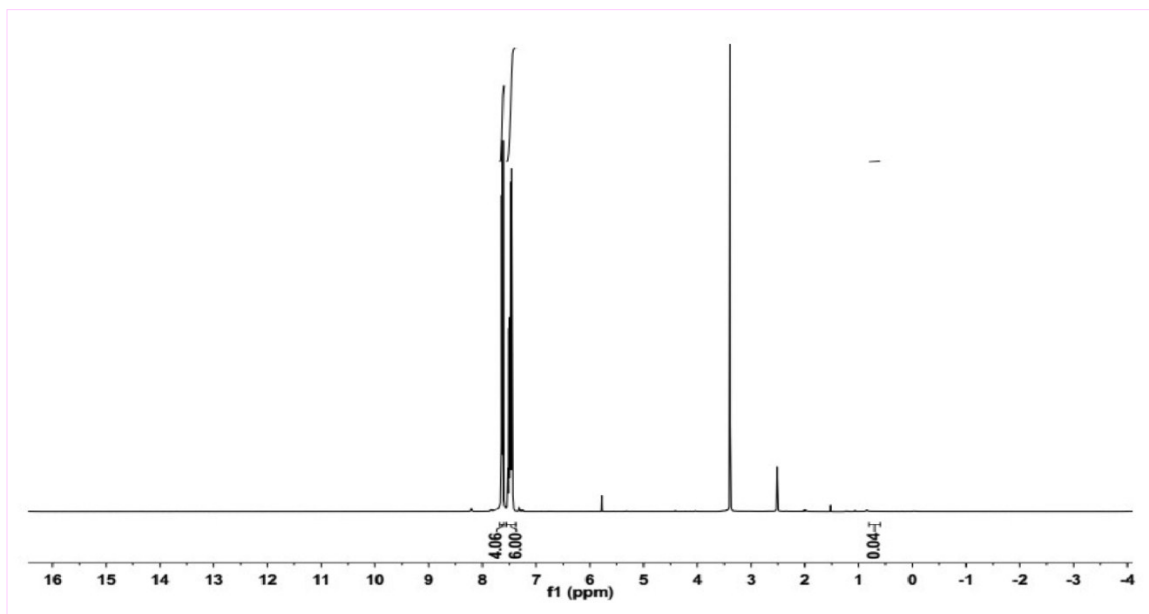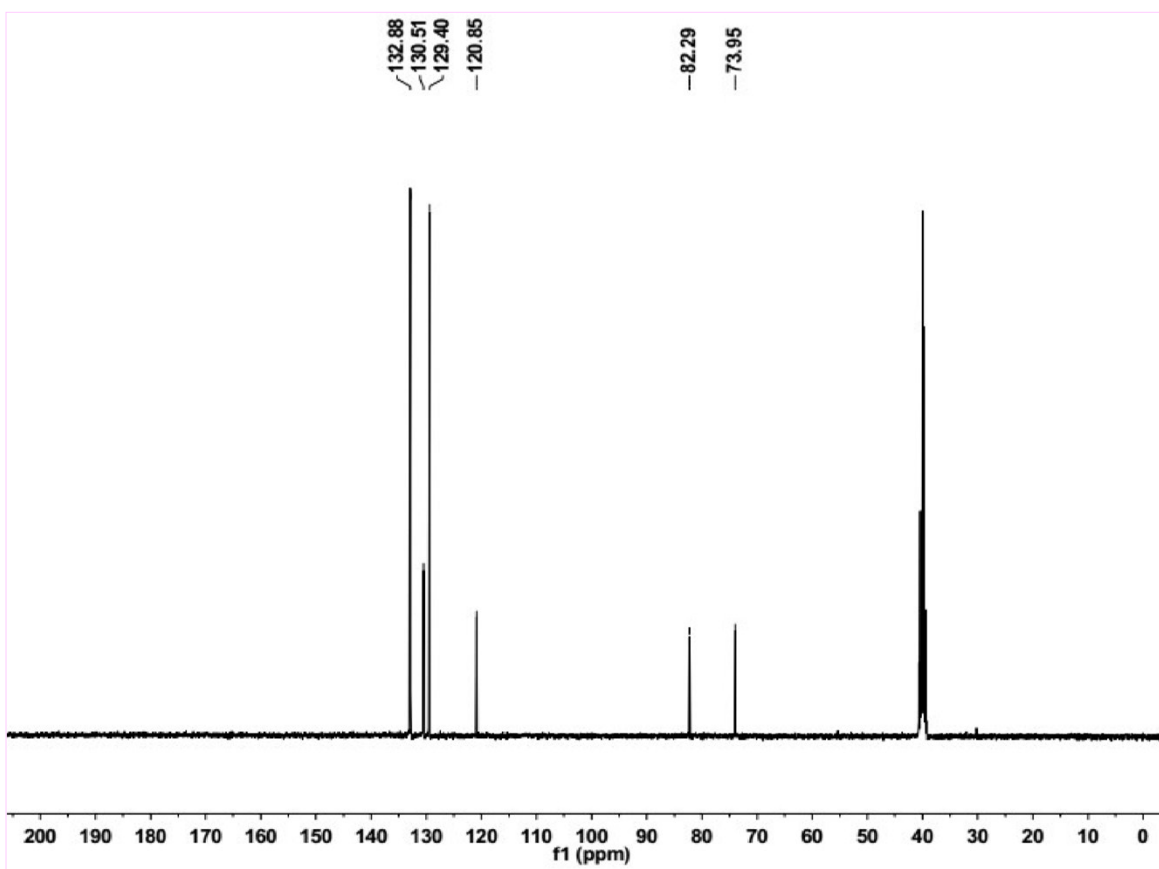

Figure S6 <sup>1</sup>H NMR and <sup>13</sup>C NMR spectrum of 1,4-diphenyl buta-1,3-diyne.

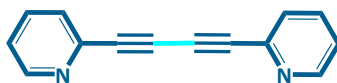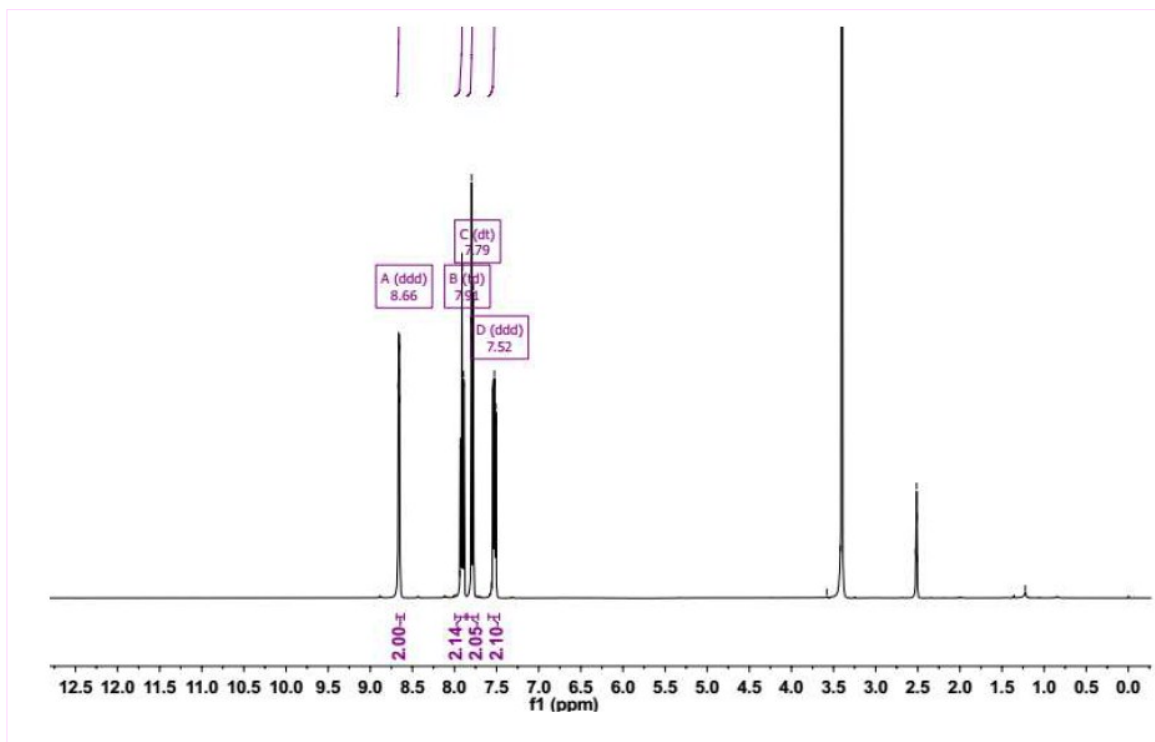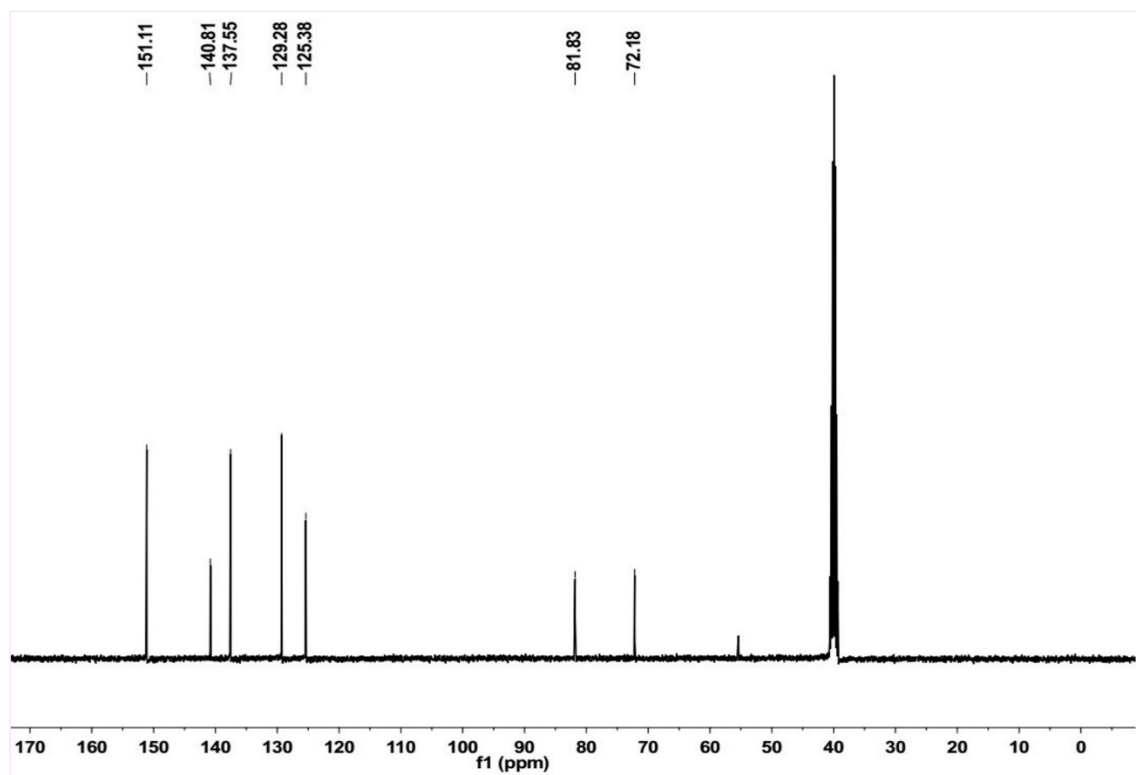

Figure S7 <sup>1</sup>H NMR and <sup>13</sup>C NMR spectrum of 1,4-di(pyridin-2-yl)buta-1,3-diyne.



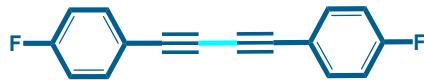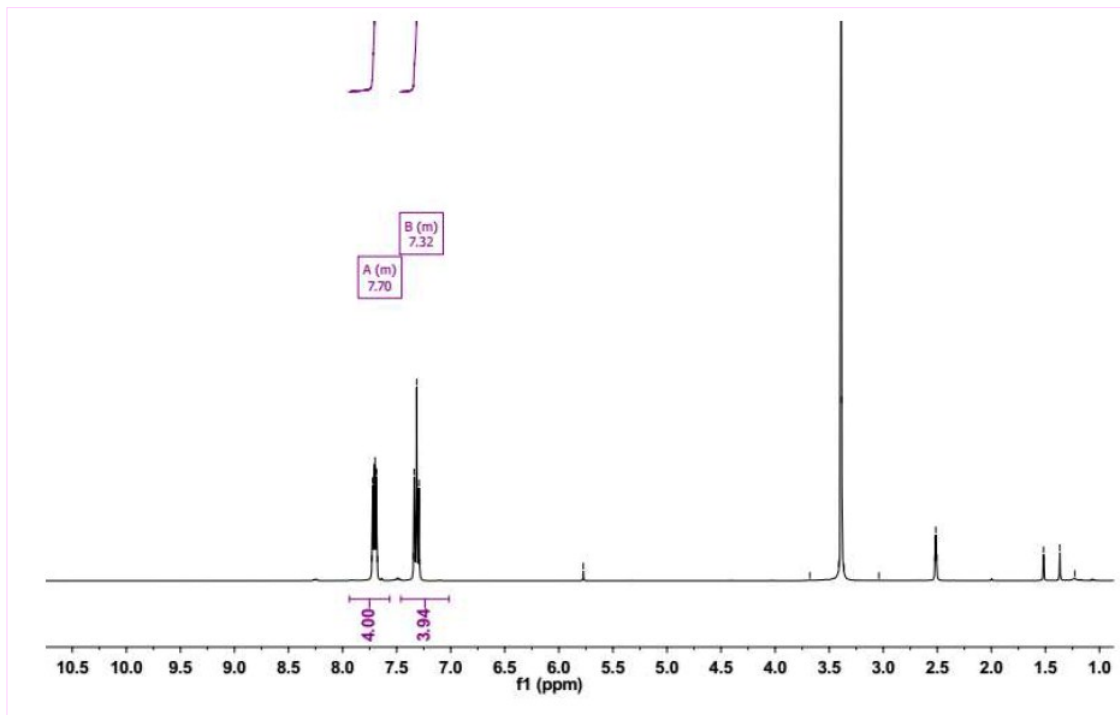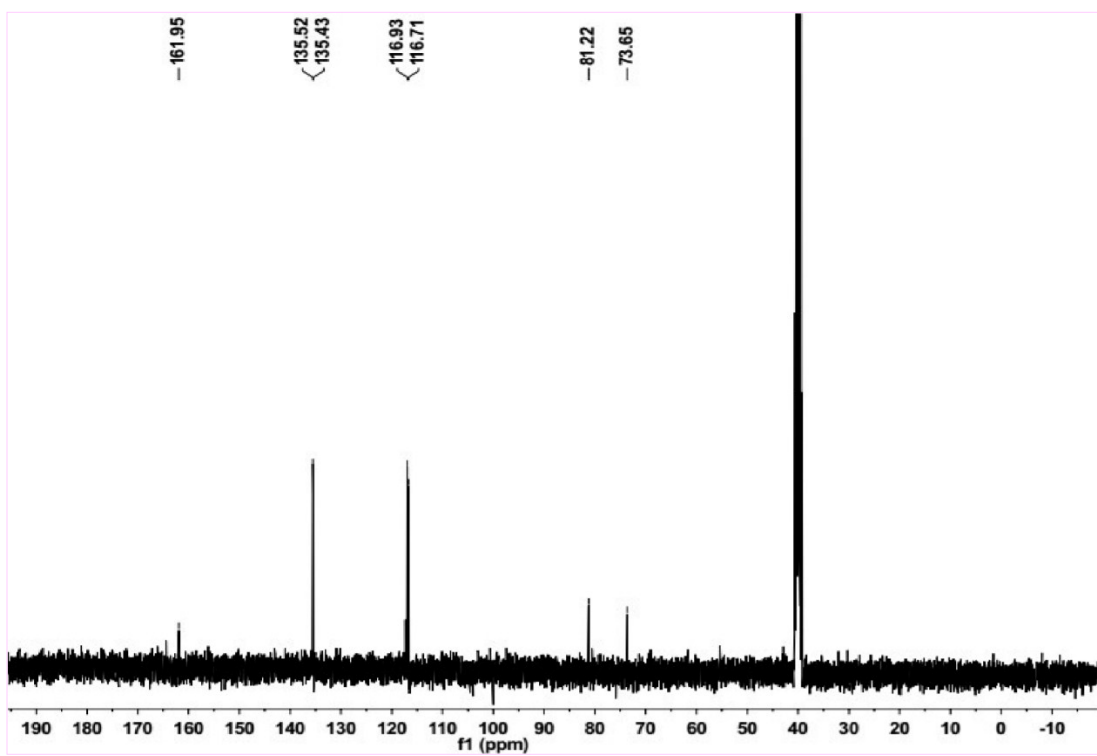

Figure S8 <sup>1</sup>H NMR and <sup>13</sup>C NMR spectrum of 1,4-bis(*p*-fluorophenyl)buta-1,3-diyne.

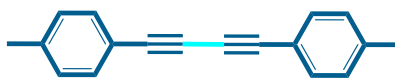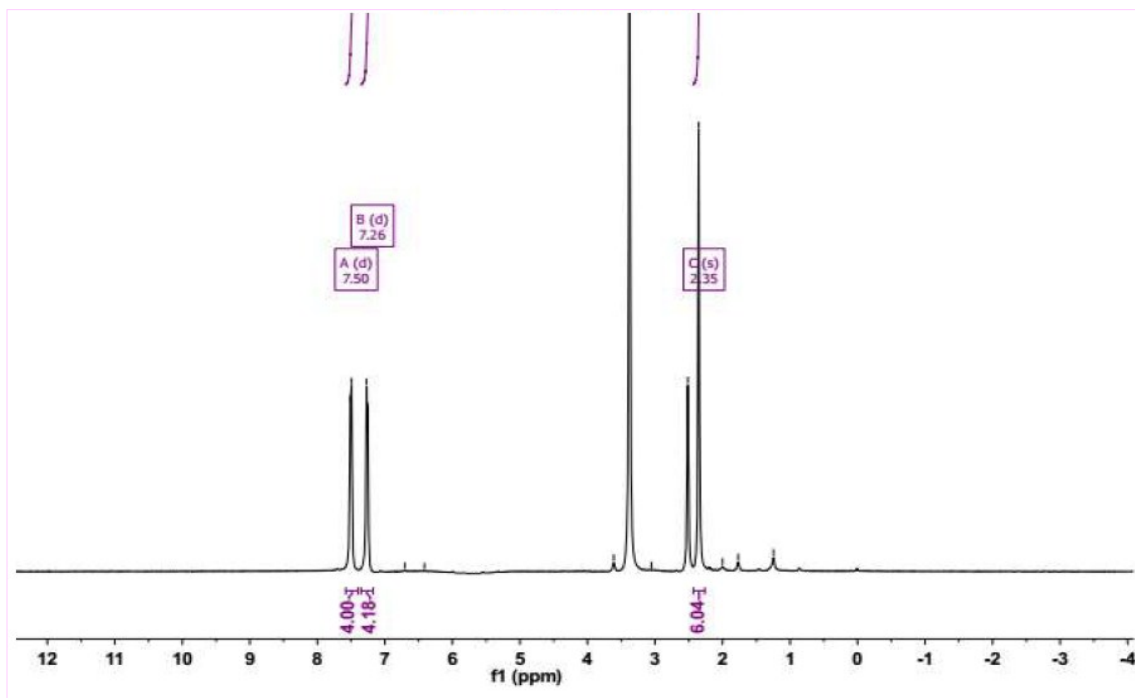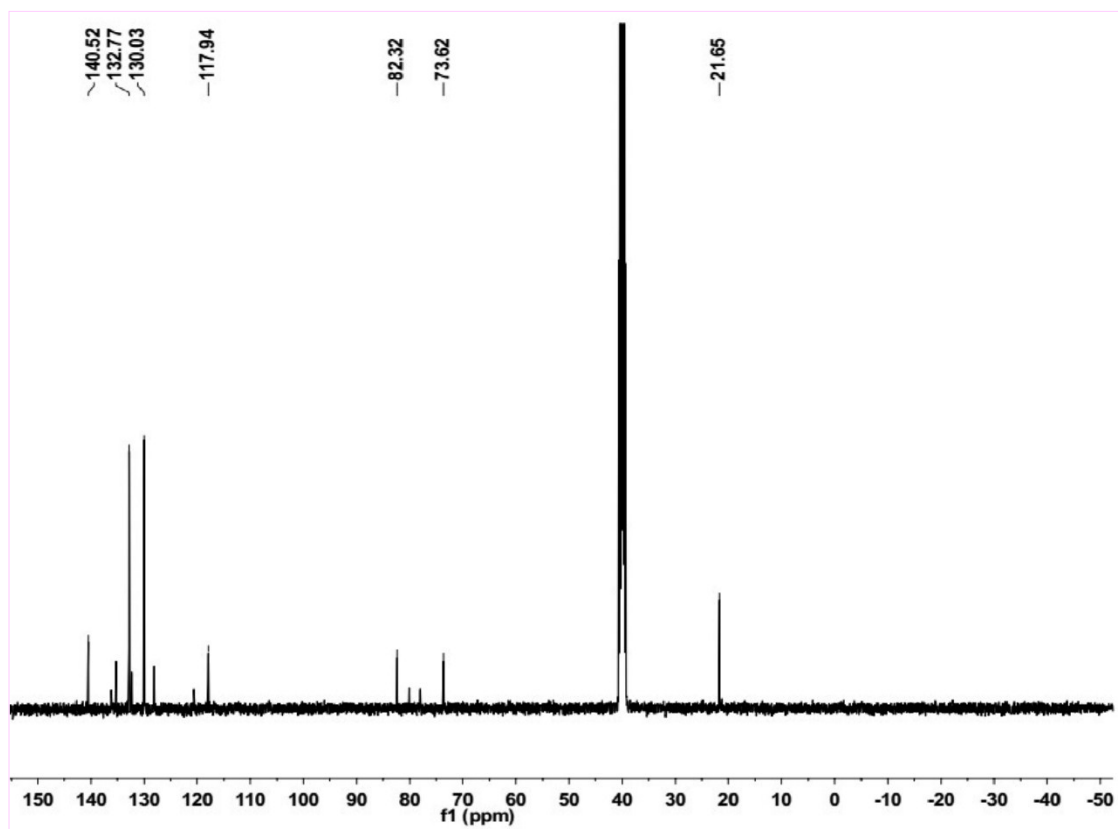

Figure S9 <sup>1</sup>H NMR and <sup>13</sup>C NMR spectrum of 1,4-bis(*p*-tolyl)buta-1,3-diyne.

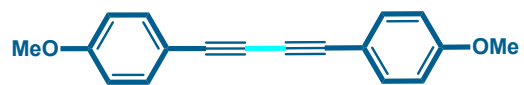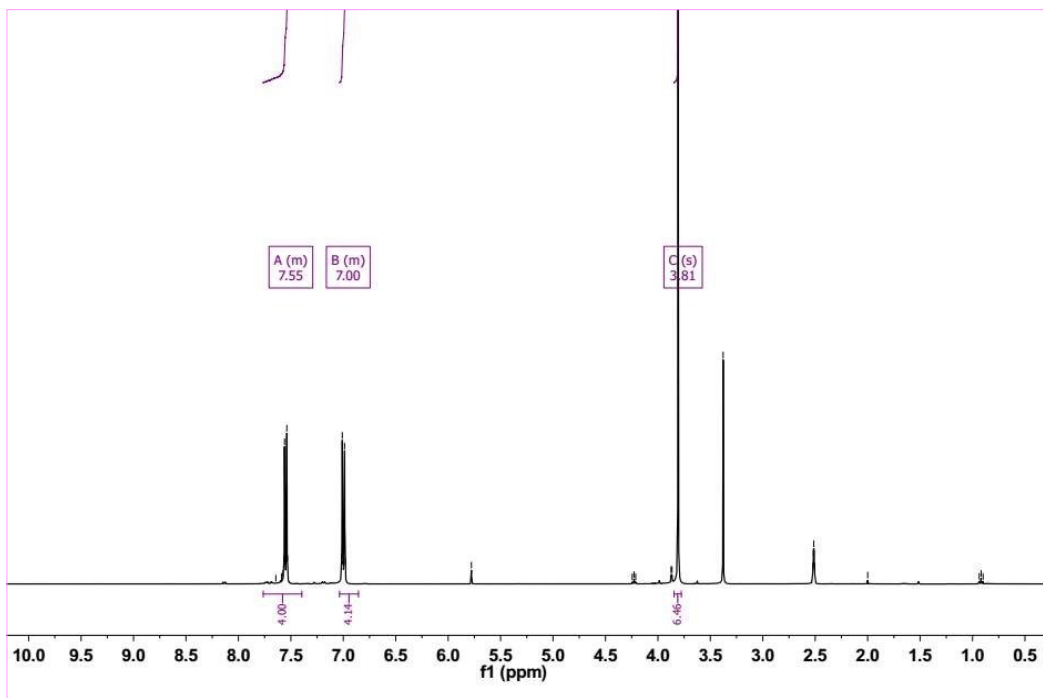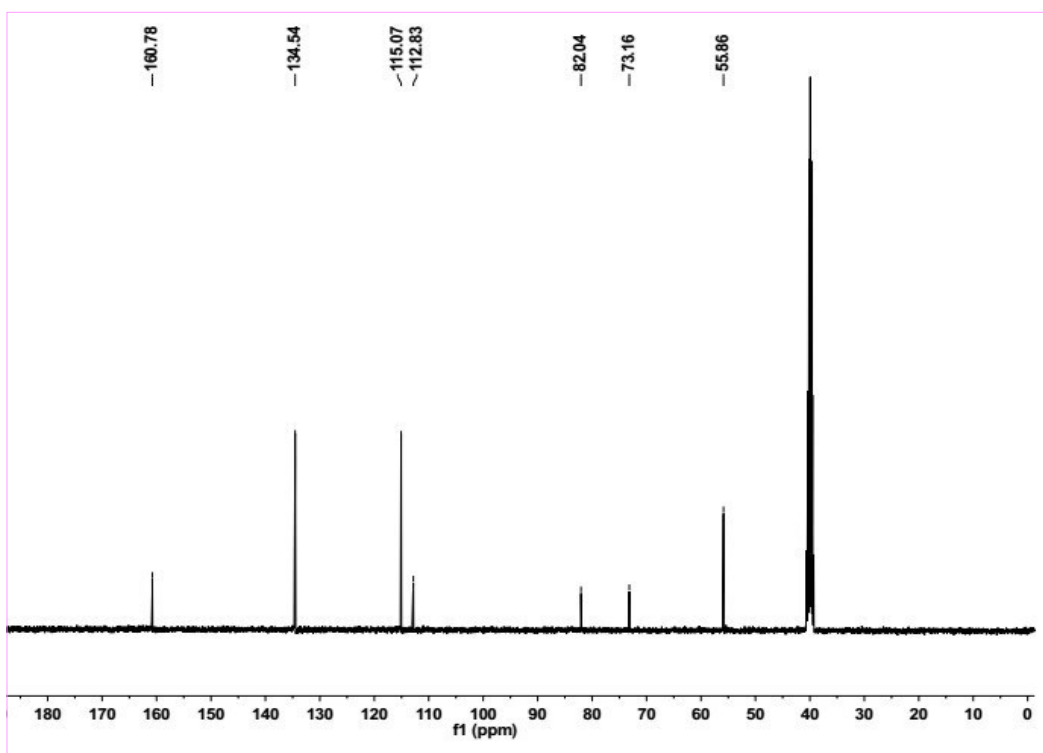

Figure S10 <sup>1</sup>H NMR and <sup>13</sup>C NMR spectrum of 1,4-bis(4-methoxyphenyl)buta-1,3-diyne.

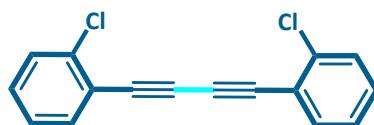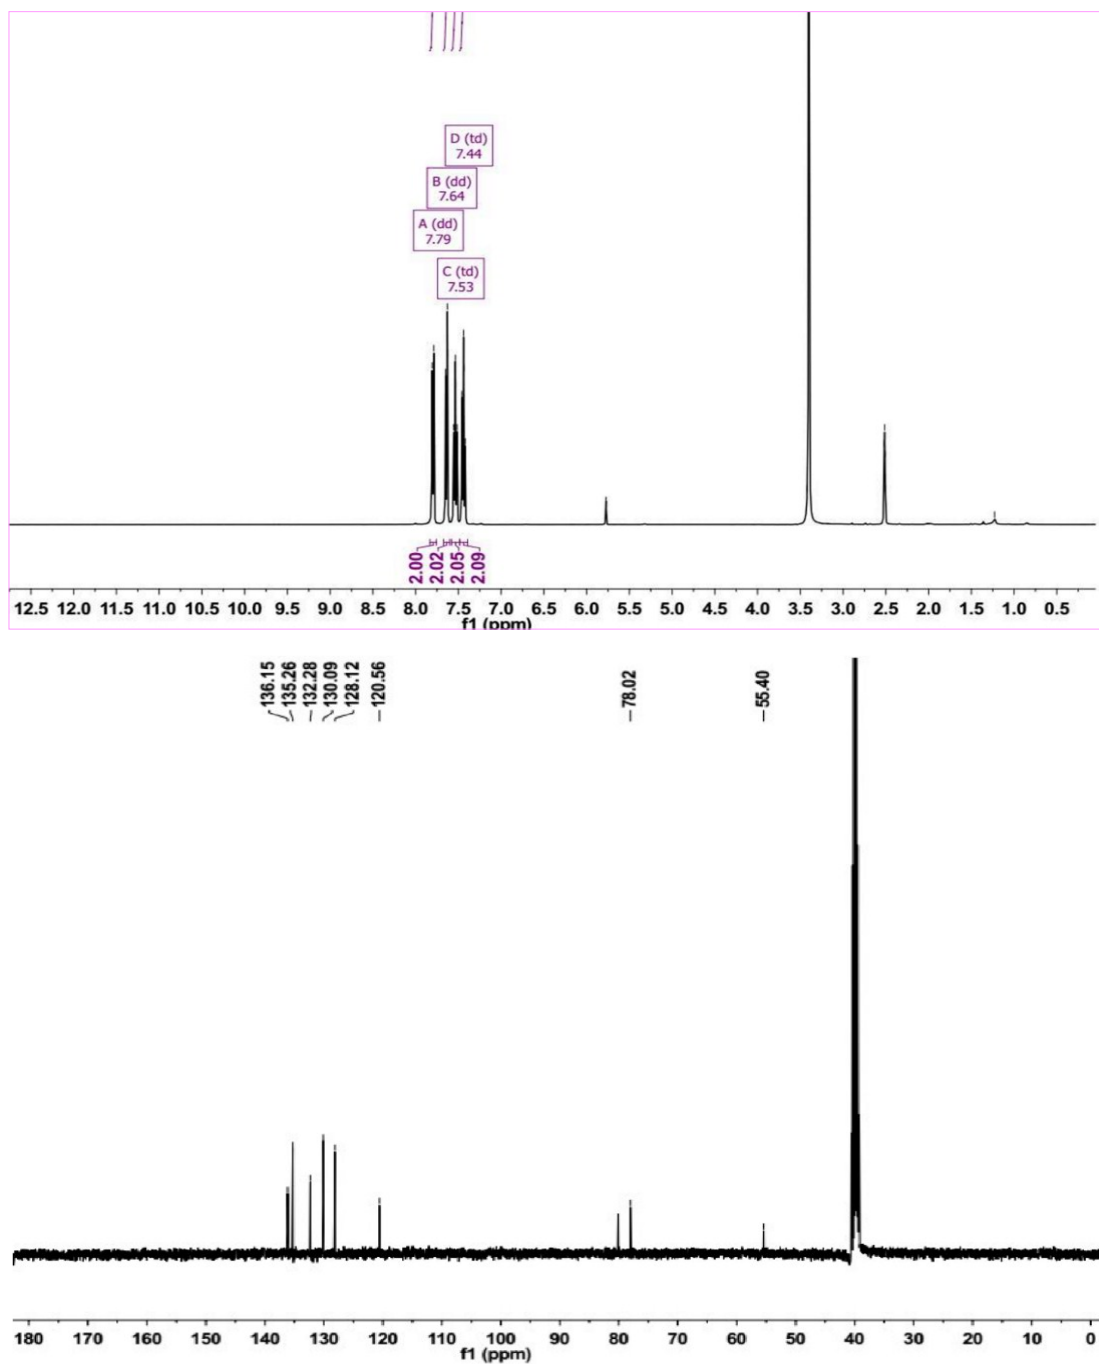

Figure S11 <sup>1</sup>H NMR and <sup>13</sup>C NMR spectrum of 1,4-bis(2-chlorophenyl)buta-1,3-diyne.
